# Supplementary material for: Overcoming the interfacial challenges of Ni-rich layered oxide cathodes for all-solid-state batteries through an ultrathin and amorphous Al 2 O 3 coating
Source: Royal Society of Chemistry journal article supplement (doi:10.1039/d4ta05226a), 2024-01-01
Supplement: d4ta05226a1.pdf [file d4ta05226a1.pdf]

## Electronic Supplementary Information (ESI)

### **Overcoming the interfacial challenges of Ni-rich layered oxide cathodes for all-solid-state batteries through ultrathin and amorphous Al<sub>2</sub>O<sub>3</sub> coating**

Hun Shim<sup>‡a</sup>, Hyun-seung Kim<sup>‡b</sup>, Jae Yup Jung<sup>b</sup>, Kyeong-Ho Kim<sup>c</sup>, Hyung-Ho Kim<sup>a</sup>, Eungjae Lee<sup>a</sup>, Dongjun Lee<sup>a</sup>, Woosuk Cho<sup>b\*</sup>, and Seong-Hyeon Hong<sup>a\*</sup>

<sup>a</sup> Department of Materials Science and Engineering and Research Institute of Advanced Materials, Seoul National University, Seoul 08826, Republic of Korea.

<sup>b</sup> Advanced Batteries Research Center, Korea Electronics Technology Institute, Gyeonggi 13509, Republic of Korea.

<sup>c</sup> Department of Materials Science and Engineering, Pukyong National University, Busan 48513, Republic of Korea.

‡ The first and second authors contributed equally to this work.

\* Corresponding author

Dr. Woosuk Cho (W. Cho)

E-mail: cho4153@keti.re.kr

Prof. Seong-Hyeon Hong (S.-H. Hong)

E-mail: shhong@snu.ac.kr

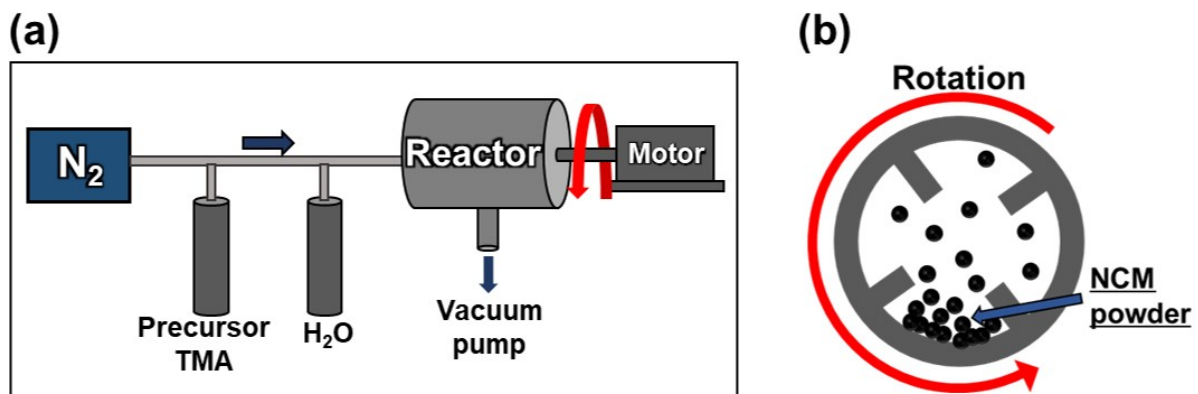

**Fig. S1.** Schematic illustration of a) powder ALD system and b) cross-section view of the reaction chamber.

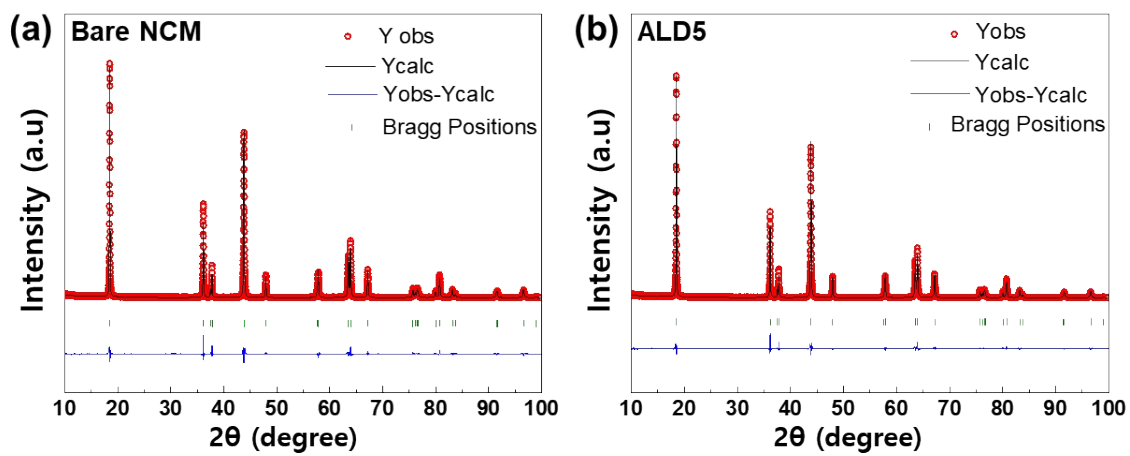

**Fig. S2.** Result profiles after Rietveld refinement for as-synthesized a) bare NCM and b) ALD5 cathode powders.

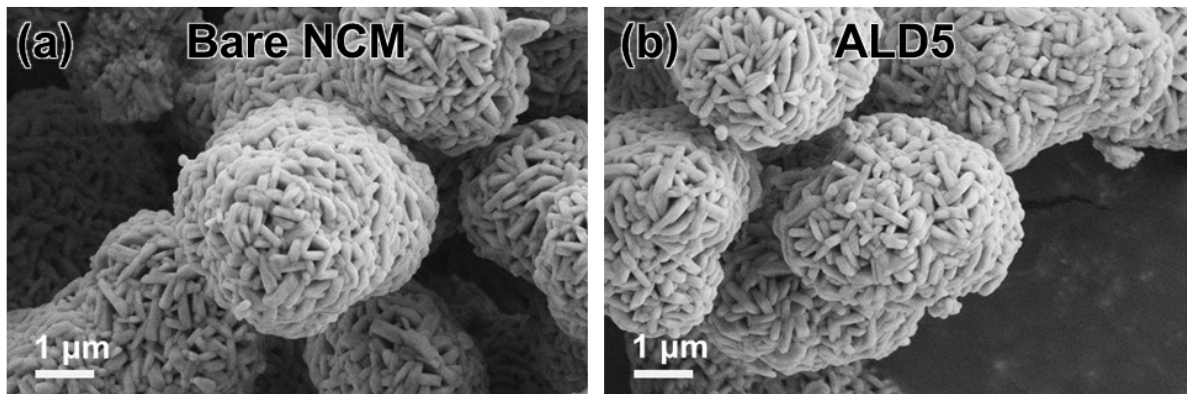

**Fig. S3.** SEM images of as-synthesized a) bare NCM and b) ALD5 cathode powders.

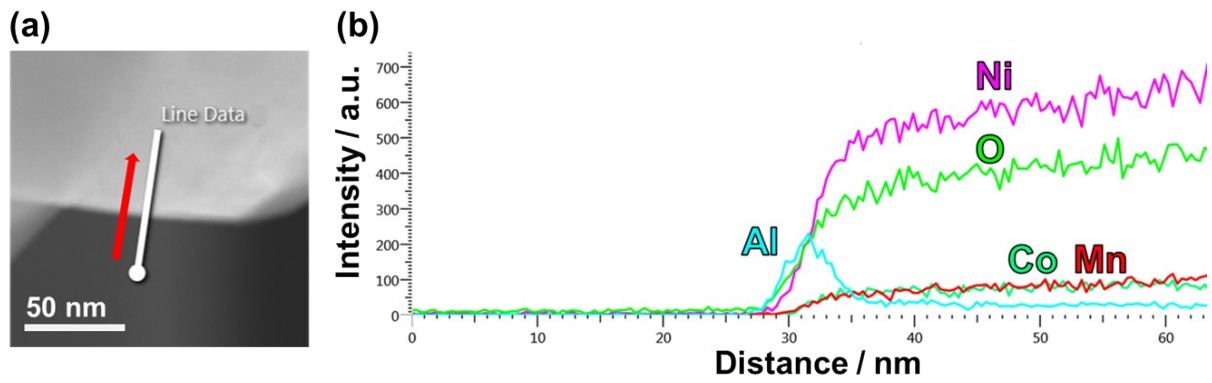

**Fig S4.** a) High magnification TEM image of as-synthesized ALD5 powder and b) elemental distribution obtained by the EDS line scan along the white line shown in a).

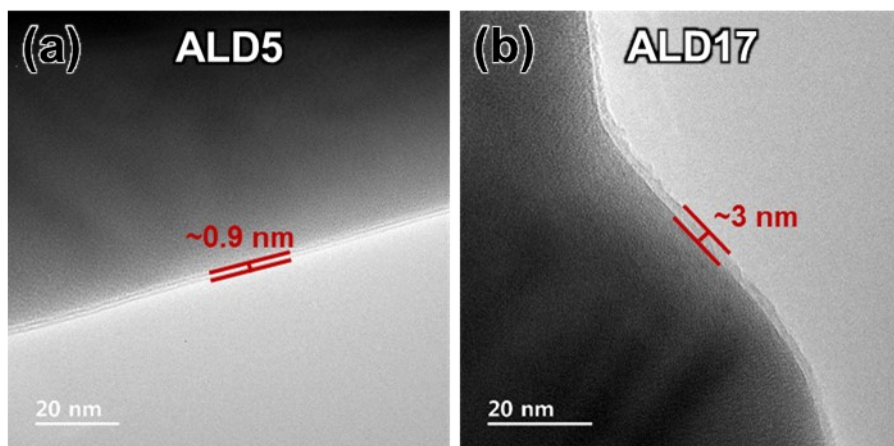

**Fig S5.** TEM images of as-synthesized a) ALD5 and b) ALD17 powder.

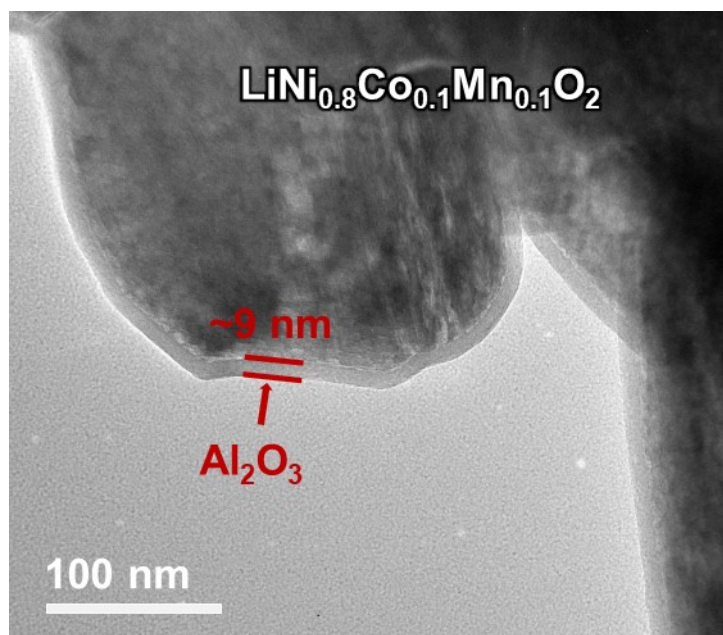

**Fig. S6.** Low magnification TEM image of as-synthesized ALD50 powder.

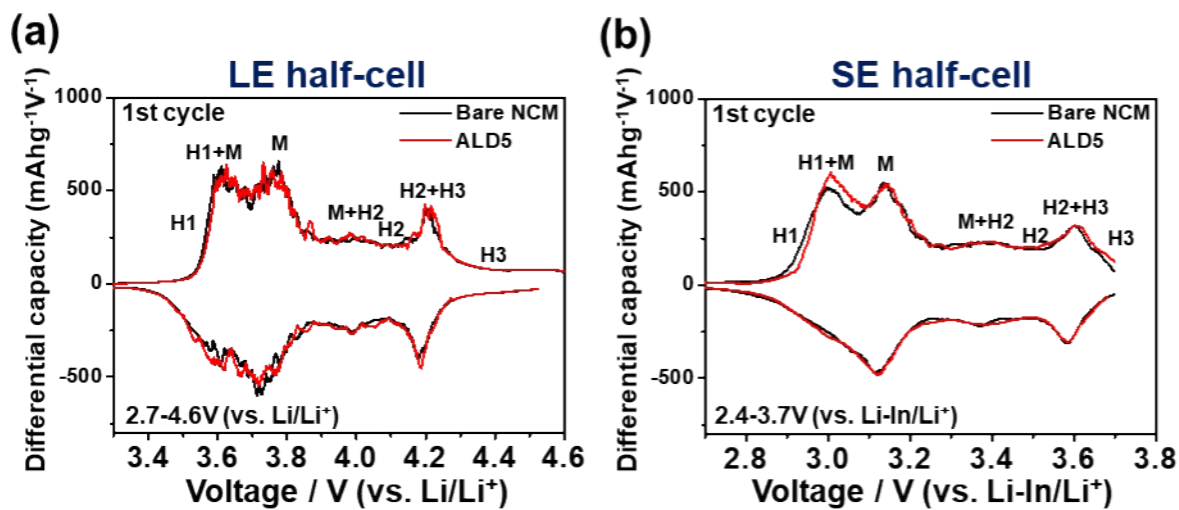

**Fig. S7.** Differential capacity ( $dQ dV^{-1}$ ) profiles obtained by differentiating the initial charge-discharge voltage profiles of bare NCM and ALD5 electrodes in a) LE half-cells and b) SE half-cells.



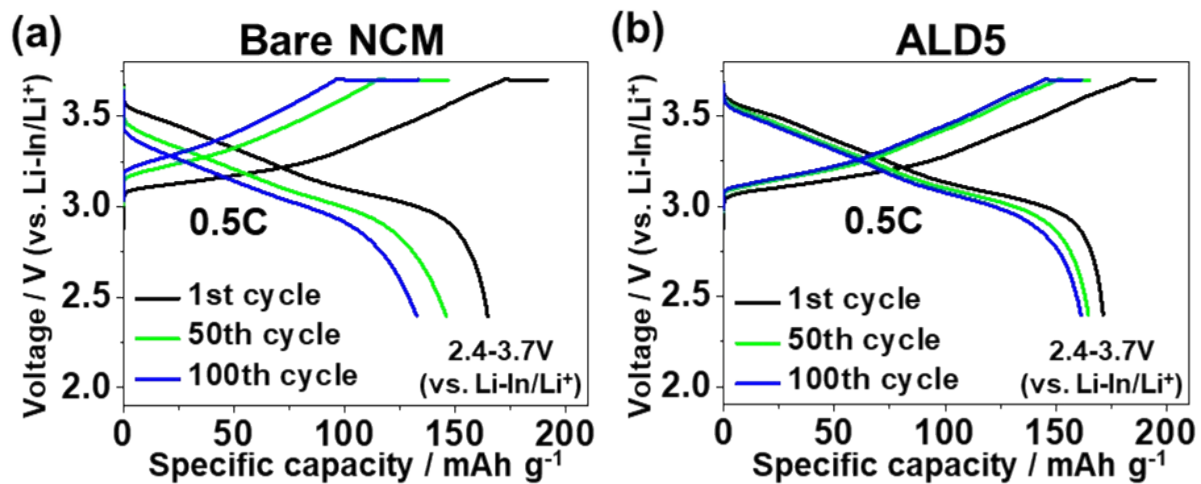

**Fig. S8.** Initial charge–discharge voltage profiles for 1st, 50th, and 100th cycles of a) bare NCM and b) ALD5 electrodes at the current density of 0.5 C CC-CV between 2.4 and 3.7 V (vs. Li-In/Li<sup>+</sup>) at 25 °C in SE half-cells.

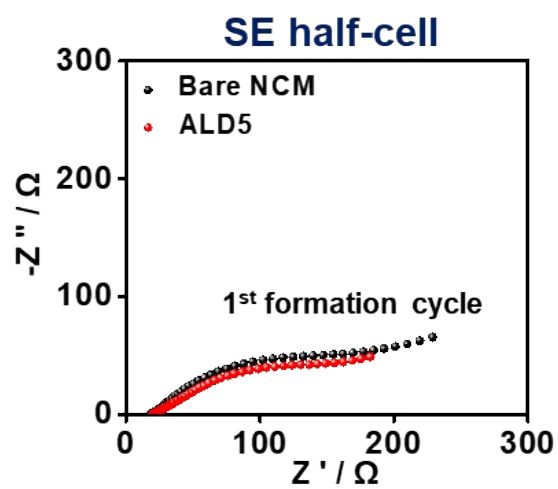

**Fig. S9.** Nyquist plots for bare NCM and ALD5 electrodes after 1<sup>st</sup> cycle in SE half-cells (the cells were discharged to 3.7 V (vs. Li-In/Li<sup>+</sup>) for the EIS measurement).

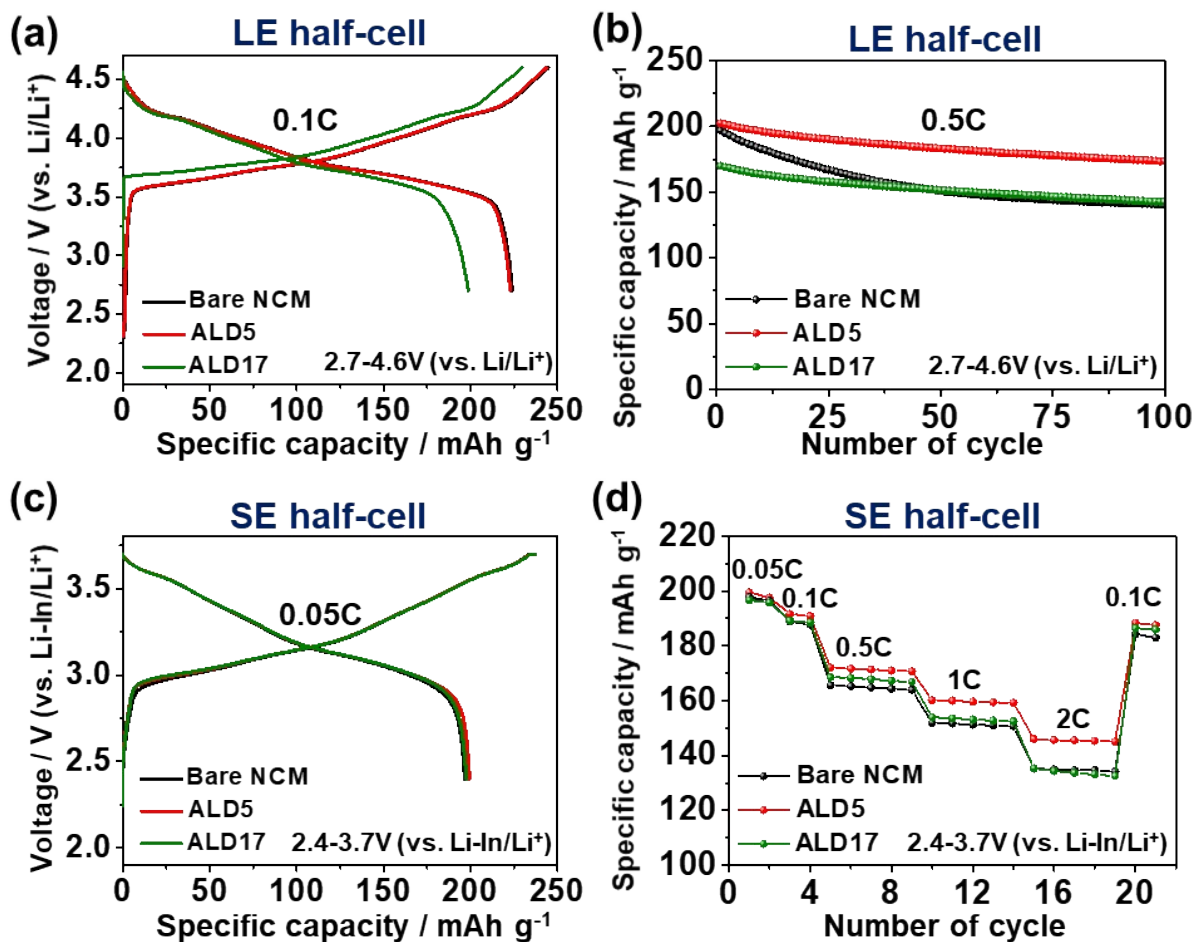

**Fig. S10.** a) Initial charge–discharge voltage profiles at the current density of 0.1 C, b) cycle performance at the current density of 0.5 C for bare NCM, ALD5, and ALD17 electrodes between 2.7 and 4.6 V (vs. Li/Li<sup>+</sup>) at 25 °C in LE half-cells, c) initial charge–discharge voltage profiles at the current density of 0.05 C, d) rate test for bare NCM, ALD5, and ALD17 electrodes between 2.4 and 3.7 V (vs. Li-In/Li<sup>+</sup>) at 25 °C in SE half-cells.

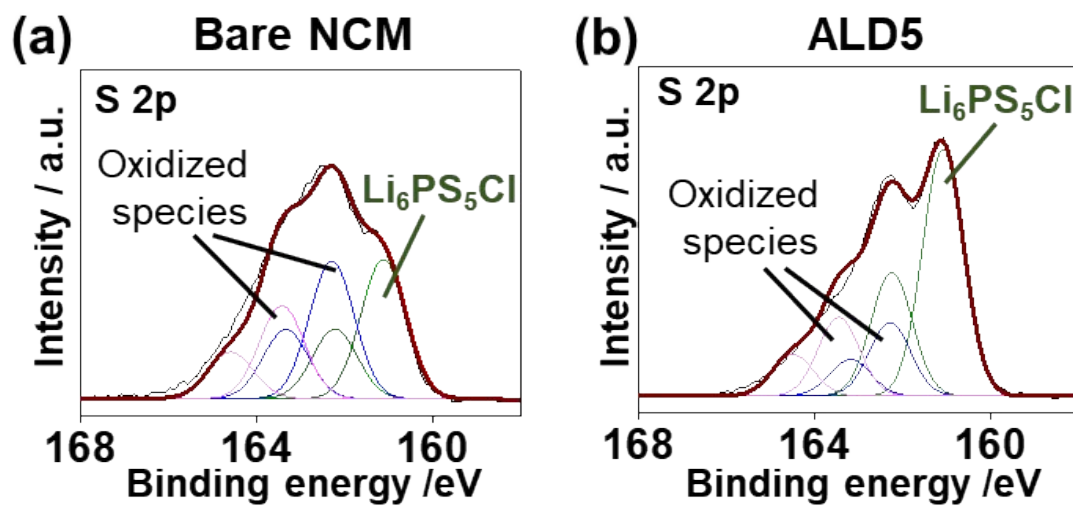

**Fig. S11.** Deconvoluted S 2p spectra of a) bare NCM and b) ALD5 after evaluation of their cycle performance in SE half-cells.

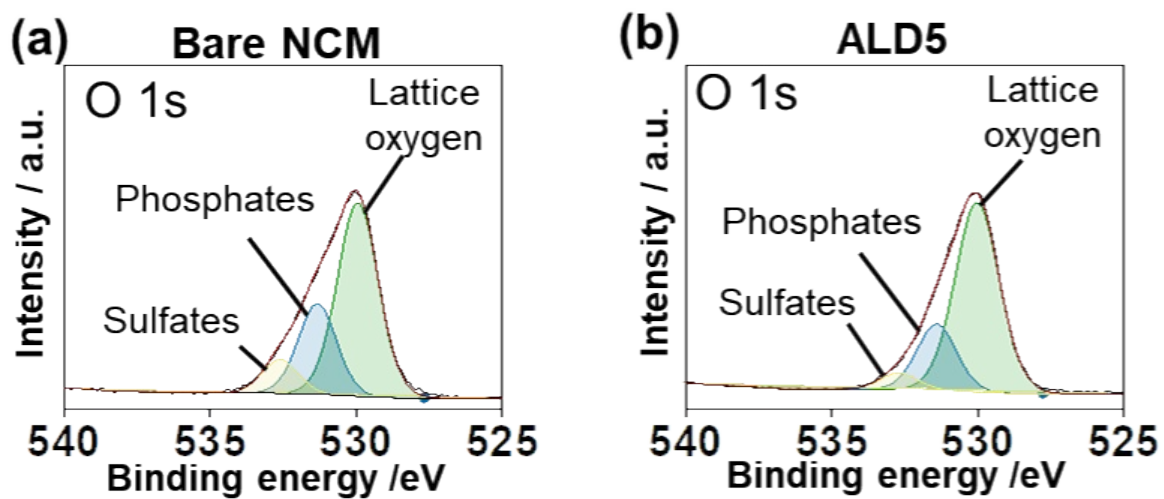

**Fig. S12.** Ex situ XPS O 1s spectra of a) bare NCM and b) ALD5 after evaluation of their cycle performance in dry-electrode cells.

**Table S1.** Rietveld refinement results for as-synthesized bare NCM and ALD5 cathode

| <b>Sample</b>   | a-axis<br>[Å] | c-axis<br>[Å] | c/a   | V<br>[Å] <sup>3</sup> |
|-----------------|---------------|---------------|-------|-----------------------|
| <b>Bare NCM</b> | 2.874         | 14.205        | 4.942 | 101.609               |
| <b>ALD5</b>     | 2.875         | 14.204        | 4.941 | 101.673               |

powders.
